# Supplementary material
Source: PubMed Central journal article supplement (PMC7964522)
Supplement: 3937_tables.pdf [file 3937_tables.pdf]

**On-line Table 1: MRI lesion counts and clinical measures in individual patients with MS in the clinic**

| Criteria                       | MS Diagnosis after a First Clinical Attack                          |                                                                                           | Treatment Nonresponder                                                                                                  |                                                                                                                                                                                                                    |
|--------------------------------|---------------------------------------------------------------------|-------------------------------------------------------------------------------------------|-------------------------------------------------------------------------------------------------------------------------|--------------------------------------------------------------------------------------------------------------------------------------------------------------------------------------------------------------------|
|                                | Dissemination in Space                                              | Dissemination in Time                                                                     | Modified Rio Score <sup>6</sup>                                                                                         | Canadian MS Working Group <sup>5a</sup>                                                                                                                                                                            |
| Infratentorial T2 lesion       | ≥1                                                                  | 2 of the 4 are required                                                                   | 4 (>1 year)                                                                                                             | MRI level of concern based on new T2 or enhancing lesions (low, 1; medium, 2; high, ≥3)                                                                                                                            |
| Spinal cord T2 lesion          | ≥1                                                                  |                                                                                           |                                                                                                                         |                                                                                                                                                                                                                    |
| Juxtacortical T2 lesion        | ≥1                                                                  |                                                                                           |                                                                                                                         |                                                                                                                                                                                                                    |
| Periventricular T2 lesion      | ≥1                                                                  |                                                                                           |                                                                                                                         |                                                                                                                                                                                                                    |
| New T2 lesion                  |                                                                     | ≥1 (combined with nonenhancing T2) sufficient at time of first attack (or) new MRI lesion | 0, 1, 2                                                                                                                 | Level of concern (low, medium, high) based on rate, severity, recovery                                                                                                                                             |
| Enhancing lesion               |                                                                     |                                                                                           |                                                                                                                         |                                                                                                                                                                                                                    |
| Relapse                        |                                                                     |                                                                                           |                                                                                                                         |                                                                                                                                                                                                                    |
| Disease progression/disability |                                                                     |                                                                                           |                                                                                                                         | Level of concern (low, medium, high) based on multiple defined disability scores                                                                                                                                   |
| Comment                        | Based on International Panel Criteria for MS Diagnosis <sup>2</sup> |                                                                                           | Score (0–3) is based on combination of MRI + relapse criteria (eg maximum score of 3 for ≥2 relapses and ≥5 T2 lesions) | Consideration given to switching treatments if there is a high level of concern in any one domain (relapses, progression, or MRI); medium level of concern in any 2 domains; low level of concern in all 3 domains |

<sup>a</sup> Treatment-response data based primarily on interferon trials.

**On-line Table 2: Suggested MRI ordering menu for neurologists**

| MRI Examination Menu (Choose 1)                                                                                                               |
|-----------------------------------------------------------------------------------------------------------------------------------------------|
| 1) Brain diagnostic scan (includes differential but not discrete MS data)                                                                     |
| 2) Screening/monitoring of patients with possible MS (includes differential plus discrete MS data; may serve as a baseline for MS evaluation) |
| 3) Monitoring patients with known MS (provides discrete disease activity data, but not differential)                                          |
| 4) Patient with known MS on natalizumab (Tysabri) (provides discrete disease activity data plus evaluates for early signs of PML)             |

**Note:**—PML indicates progressive multifocal leukoencephalopathy.

**On-line Table 3: Interpretation guidelines**

| MS Interpretation Template                                                                                                                |
|-------------------------------------------------------------------------------------------------------------------------------------------|
| HISTORY: (multiple sclerosis—for monitoring)                                                                                              |
| TECHNIQUE: (insert text)                                                                                                                  |
| RESULTS: (insert text)                                                                                                                    |
| Definite nonenhancing new T2 lesions: (0, 1, 2, 3, 4, ≥5)                                                                                 |
| Definite new enhancing lesions: (0, 1, 2, 3, 4, 5, 6, 7, 8, 9, ≥10)                                                                       |
| T2 lesion volume: none, mild, moderate (eg, becoming or early confluent), severe                                                          |
| Parenchymal volume loss: none, mild, moderate, severe                                                                                     |
| T1 black hole volume (none, mild, moderate [eg, becoming or early confluent], severe)                                                     |
| IMPRESSION: (findings consistent with clinical diagnosis of MS; interval development of 2 definite new T2 lesions and 1 enhancing lesion) |
